# Supplementary material for: The Use of the Central Vein Sign in the Diagnosis of Multiple Sclerosis: A Systematic Review and Meta-analysis
Source: PubMed Central journal article supplement (PMC7760678; doi:10.3390/diagnostics10121025), 2020-11-29
Supplement: diagnostics-10-01025-s001.pdf [file diagnostics-10-01025-s001.pdf]

# Supplementary Materials

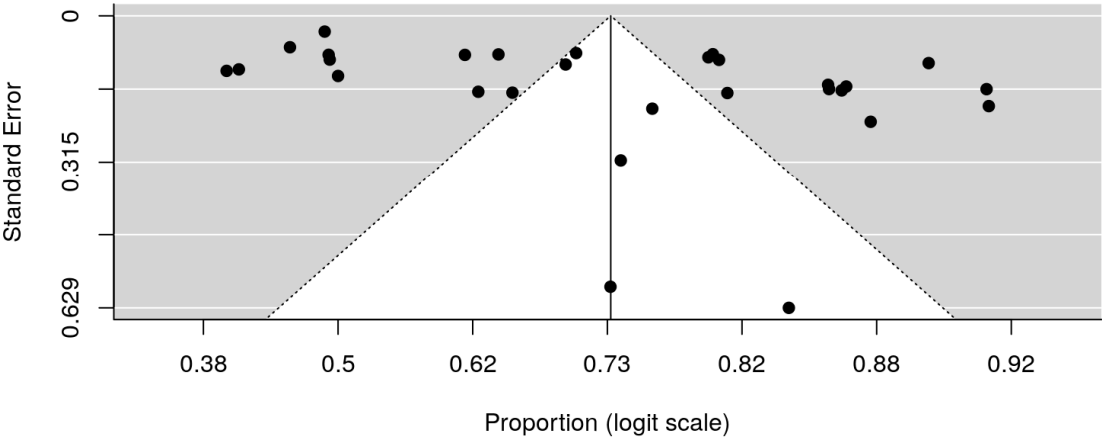

**Figure 1.** Funnel plot of proportional Meta-Analysis to evaluate the risk of publication bias in assessing the proportion of MS lesion with the central vein sign.

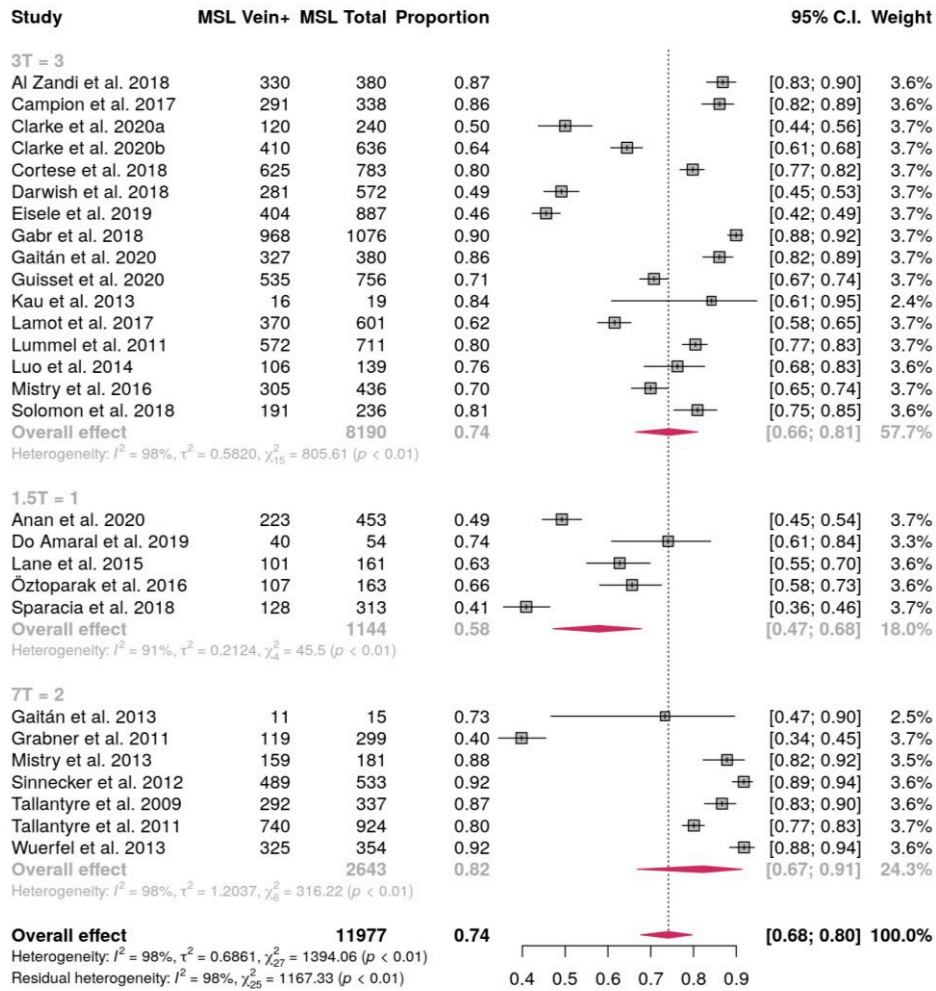

**Figure 2.** Forest plot of the sub-group analysis based on the scanner field strength (1.5T, 3T or 7T) showing the proportional Meta-Analysis of the pooled proportion of MS lesion with central vein sign (MSL Vein+).

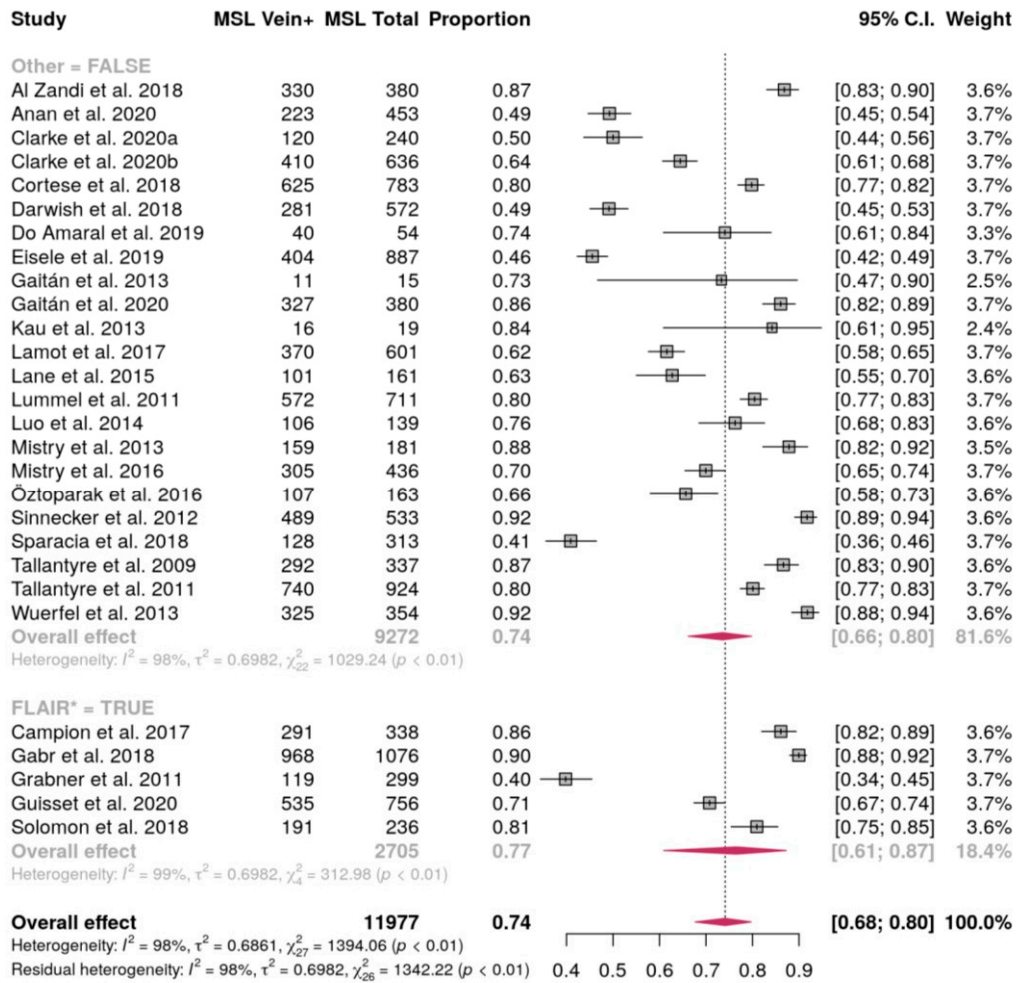

**Figure 3.** Forest plot of the sub-group analysis based on the post-processing technique used (FLAIR\* vs. others) showing the proportional Meta-Analysis of the pooled proportion of MS lesion with central vein sign (MSL Vein+).

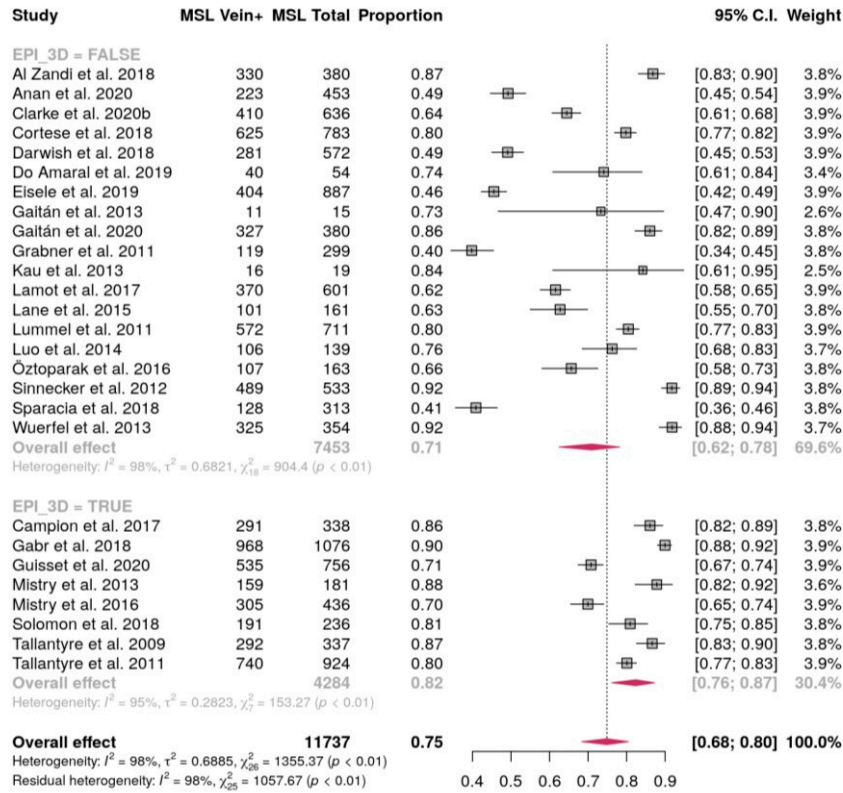

**Figure 4.** Forest plot of the sub-group analysis based on the MRI sequence performed (3D-EPI vs. others) showing the proportional Meta-Analysis of the pooled proportion of MS lesion with central vein sign (MSL Vein+).

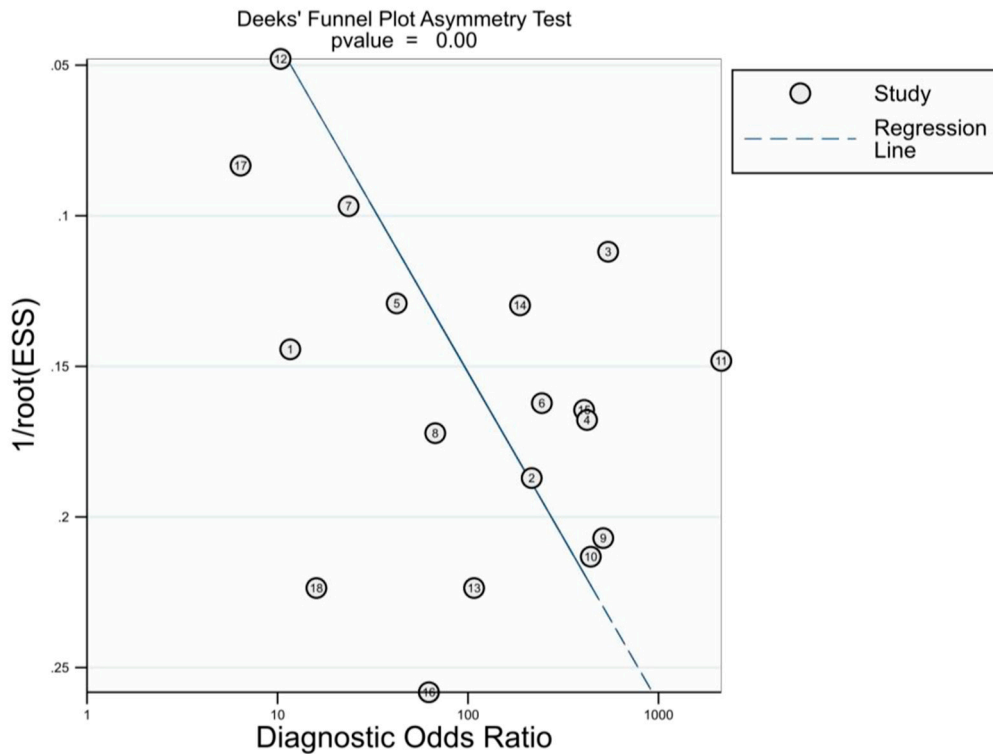

**Figure 5.** Deeks funnel plot asymmetry test for assessment of publication bias.  $p$ -values  $< 0.05$  were considered as significant. ESS: Effective sample size.
